# Supplementary material
Source: MDPI journal article supplement (https://www.mdpi.com/1099-4300/25/9/1258)
Supplement: s1 [file s1]

## Supplemental material

**Table S1:** Classification of food items based on the Mexico City's normative basket. The table also shows the food items included in the analysis that were available in the Mexican National Survey of Household Income and Expenditure 2018

| ENIGH 2018       |                  |                                                      | Mexico City's normative food basket     |
|------------------|------------------|------------------------------------------------------|-----------------------------------------|
| Food groups      | Subgroups        | Food items                                           | Food items                              |
| GRAINS           | Rice             | Rice                                                 | Rice                                    |
|                  | Oats             | Breakfast cereal (maize, wheat, rice, oats, granola) | Oats                                    |
|                  | Maize            |                                                      | Maize breakfast cereal (no sugar added) |
|                  |                  | Corn tortilla                                        | Corn tortilla                           |
|                  | Wheat            | White bread                                          | White bread                             |
|                  |                  | n/a                                                  | Wheat bread                             |
|                  | Pasta            | Pasta                                                |                                         |
| ROOTS AND TUBERS |                  | Potato                                               | Potato                                  |
| LEGUMES          |                  | Beans                                                | Beans                                   |
|                  |                  | Lentils                                              | Lentils                                 |
| NUTS AND SEEDS   |                  | Bulk seeds (including peanuts)                       | Toasted peanuts                         |
| VEGETABLES       | Fresh vegetables | Green leaves (chard, spinach, purslane)              | Spinach                                 |
|                  |                  | Zucchini                                             | Zucchini                                |
|                  |                  | Onion                                                | Onion                                   |
|                  |                  | Chayote squash                                       | Chayote squash                          |
|                  |                  | Tomato                                               | Tomato                                  |
|                  |                  | Cactus                                               | Cactus                                  |
|                  |                  | Chili                                                | Chili                                   |
|                  |                  | Green tomato                                         | Green tomato                            |
|                  |                  | Carrot                                               | Carrot                                  |
|                  |                  | FRUITS                                               | Fresh fruits                            |
| Apple            | Apple            |                                                      |                                         |
| Cantaloupe       | Cantaloupe       |                                                      |                                         |
| Orange           | Orange           |                                                      |                                         |
| Papaya           | Papaya           |                                                      |                                         |
| Banana           | Banana           |                                                      |                                         |
| PROCESS MEAT     | Processed meat   | Pork ham                                             | Pork ham                                |
| MEATS            | Chicken          | Chicken (legs, thighs, breast)                       | Chicken (thighs and legs)               |
|                  | Beef             | Beef fillet                                          | Beef                                    |

|                   |        |                                          |                                                   |
|-------------------|--------|------------------------------------------|---------------------------------------------------|
| FISH              |        | Canned tuna<br>Fish fillet               | Canned tuna (in oil)<br>Fish fillet               |
| DAIRY<br>PRODUCTS | Cheese | Fresh cheese<br>Oaxaca or asadero cheese | Fresh cheese<br>Oaxaca cheese                     |
|                   | Yogurt | n/a                                      | Natural yogurt                                    |
| MILK              |        | Pasteurized cow milk                     | Whole milk<br>Semi-skim milk<br>Lactose-free milk |
|                   |        | n/a                                      | Breast milk                                       |
|                   |        | n/a                                      | Substitute to breast milk                         |
| EGGS              |        | Chicken egg                              | Egg                                               |
| FAT AND<br>OILS   |        | Vegetable oil                            | Oil                                               |
|                   |        | Avocado                                  | Avocado                                           |
| SUGARS            |        | White and brown sugar                    | Brown sugar                                       |
